# Supplementary material for: Functional magnetic Prussian blue nanoparticles for enhanced gene transfection and photothermal ablation of tumor cells
Source: Royal Society of Chemistry journal article supplement (doi:10.1039/c6tb00982d), 2016-01-01
Supplement: c6tb00982d1.pdf [file c6tb00982d1.pdf]

## Supplementary Information

### **Functional magnetic Prussian blue nanoparticles for enhanced gene transfection and photothermal ablation of tumor cells**

Peng Xue<sup>‡,a</sup>, Jingnan Bao<sup>‡,b</sup>, Lei Zhang<sup>c</sup>, Zhigang Xu<sup>a</sup>, Chenjie Xu<sup>c</sup>, Yilei Zhang<sup>b</sup> and Yuejun Kang<sup>\*a</sup>

*<sup>a</sup> Faculty of Materials and Energy, Institute for Clean Energy and Advanced Materials, Southwest University, 2 Tiansheng Road, Beibei, Chongqing 400715, China, E-mail: yjkang@swu.edu.cn; Tel: +86 23-6825 4056.*

*<sup>b</sup> School of Mechanical and Aerospace Engineering, Nanyang Technological University, 50 Nanyang Avenue, Singapore 639798, Singapore.*

*<sup>c</sup> School of Chemical and Biomedical Engineering, Nanyang Technological University, 62 Nanyang Drive, Singapore 637459, Singapore.*

\* To whom correspondence should be addressed

‡ These authors contributed equally to this work.

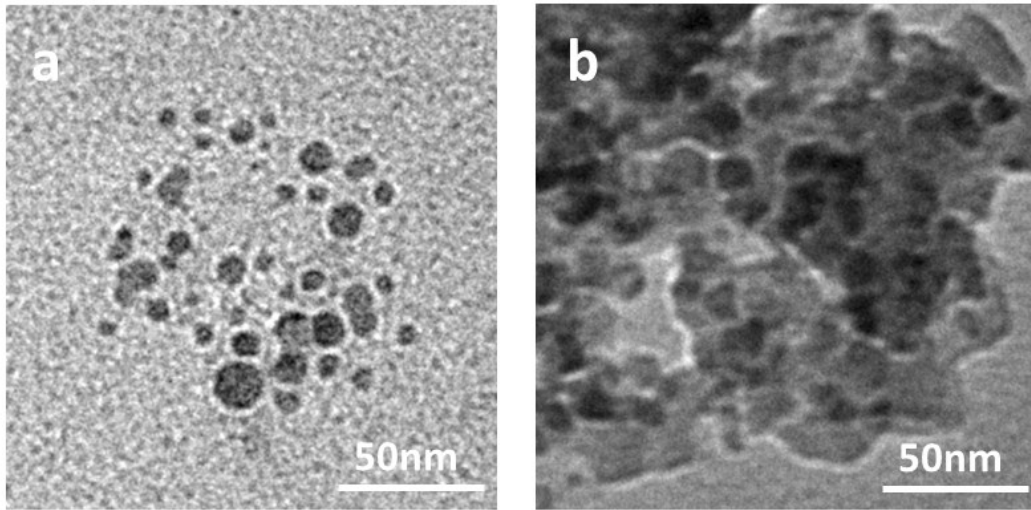

**Figure S1.** Comparison of bare  $\text{Fe}_3\text{O}_4$  NPs (a) and  $\text{Fe}_3\text{O}_4@PB@CS/DNA$  NPs (b) measured by TEM.
